# Supplementary material for: Synthesis, Structure, and Optical Properties of a Molecular Cluster Cd4(p-MBT)10
Source: MDPI journal article supplement (doi:10.3390/cryst12091236), 2022-09-01
Supplement: s1 [file s1]

# Supplementary Information

## **Synthesis, Structure Characterization and Optical Properties of a Molecular Cluster $\text{Cd}_4(p\text{-MBT})_{10}$**

Cheng Xu <sup>1</sup>, Zheng Zhou <sup>1,\*</sup>, Haixiang Han <sup>1,\*</sup>

*<sup>1</sup>Interdisciplinary Materials Research Center, School of Materials Science and Engineering, Tongji University, Shanghai 201804, China.*

\*Author to whom correspondence should be addressed.

E-mail: zhouzheng@tongji.edu.cn (Z.Z.) and hxhan@tongji.edu.cn (H.H.)

## Contents

|                                                                                       |     |
|---------------------------------------------------------------------------------------|-----|
| Solid State Structures of $[(\text{HNEt}_3)]_2[\text{Cd}_4(p\text{-MBT})_{10}]$ ..... | S3  |
| Optical Properties .....                                                              | S12 |
| Theoretical Calculation Details .....                                                 | S13 |
| References .....                                                                      | S18 |

### Solid State Structures of $[(\text{HNEt}_3)_2[\text{Cd}_4(p\text{-MBT})_{10}]$

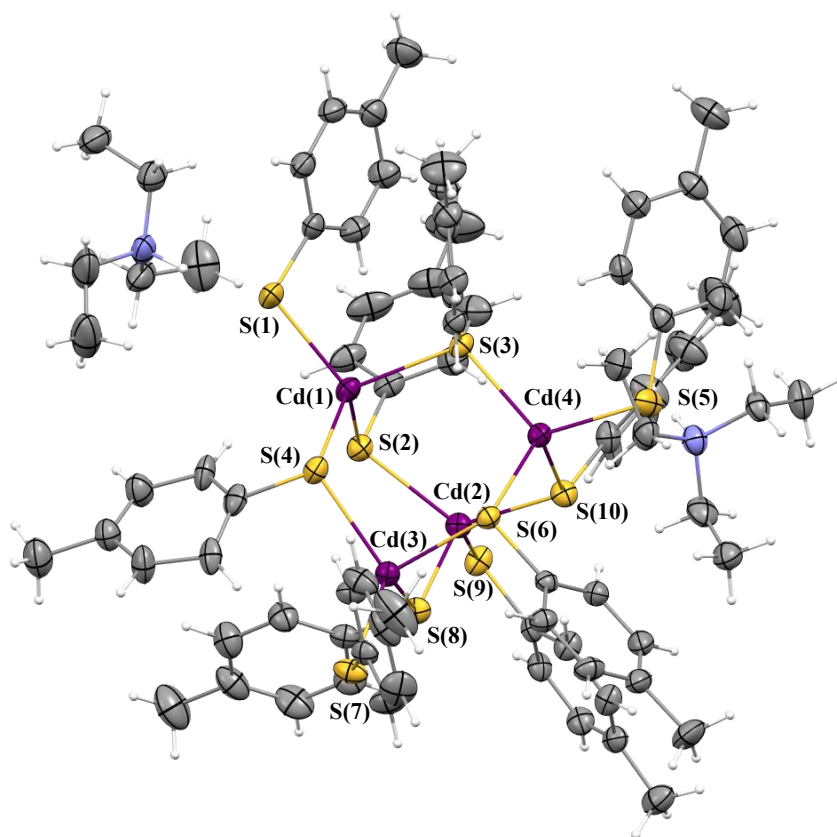

**Figure S1.** Solid state structure of  $[(\text{HNEt}_3)_2[\text{Cd}_4(p\text{-MBT})_{10}]$  drawn with thermal ellipsoids at the 40% probability level. Hydrogen atoms are represented by spheres of arbitrary radius. Only cadmium and sulfur atoms are labeled.

**Table S1.** Selected bond distances (Å) and angles (deg.) in the structure of [(HNEt<sub>3</sub>)<sub>2</sub>][Cd<sub>4</sub>(*p*-MBT)<sub>10</sub>]. Black and blue are results obtained from single crystal structure and theoretical calculation, respectively.

| Bond distances |                        | Angles           |                          | Angles           |                          |
|----------------|------------------------|------------------|--------------------------|------------------|--------------------------|
| Cd(1)–S(1)     | 2.498(7)/ <b>2.527</b> | S(1)–Cd(1)–S(2)  | 119.42(3)/ <b>116.29</b> | S(6)–Cd(3)–S(8)  | 107.25(2)/ <b>104.31</b> |
| Cd(1)–S(2)*    | 2.564(7)/ <b>2.639</b> | S(1)–Cd(1)–S(3)  | 106.37(2)/ <b>115.71</b> | S(7)–Cd(3)–S(8)  | 107.59(2)/ <b>109.05</b> |
| Cd(1)–S(3)*    | 2.545(7)/ <b>2.631</b> | S(1)–Cd(1)–S(4)  | 105.74(2)/ <b>107.66</b> | S(3)–Cd(4)–S(5)  | 117.71(2)/ <b>117.38</b> |
| Cd(1)–S(4)*    | 2.561(7)/ <b>2.641</b> | S(2)–Cd(1)–S(3)  | 105.20(2)/ <b>105.65</b> | S(3)–Cd(4)–S(6)  | 112.28(2)/ <b>103.90</b> |
| Cd(2)–S(2)*    | 2.568(7)/ <b>2.625</b> | S(2)–Cd(1)–S(4)  | 111.03(2)/ <b>103.80</b> | S(3)–Cd(4)–S(10) | 104.51(2)/ <b>106.18</b> |
| Cd(2)–S(8)*    | 2.547(6)/ <b>2.631</b> | S(4)–Cd(1)–S(3)  | 108.65(2)/ <b>106.73</b> | S(5)–Cd(4)–S(6)  | 108.30(2)/ <b>107.54</b> |
| Cd(2)–S(9)**   | 2.459(6)/ <b>2.527</b> | S(2)–Cd(2)–S(8)  | 99.28(2)/ <b>106.70</b>  | S(5)–Cd(4)–S(10) | 105.11(3)/ <b>114.66</b> |
| Cd(2)–S(10)*   | 2.556(7)/ <b>2.655</b> | S(2)–Cd(2)–S(9)  | 108.16(2)/ <b>105.98</b> | S(6)–Cd(4)–S(10) | 108.27(2)/ <b>103.54</b> |
| Cd(3)–S(4)*    | 2.584(6)/ <b>2.650</b> | S(2)–Cd(2)–S(10) | 120.64(2)/ <b>114.25</b> |                  |                          |
| Cd(3)–S(6)*    | 2.564(6)/ <b>2.635</b> | S(8)–Cd(2)–S(9)  | 117.63(2)/ <b>116.29</b> |                  |                          |
| Cd(3)–S(7)**   | 2.464(7)/ <b>2.527</b> | S(8)–Cd(2)–S(10) | 98.75(2)/ <b>96.85</b>   |                  |                          |
| Cd(3)–S(8)*    | 2.569(6)/ <b>2.624</b> | S(9)–Cd(2)–S(10) | 112.01(2)/ <b>116.54</b> |                  |                          |
| Cd(4)–S(3)*    | 2.519(6)/ <b>2.624</b> | S(4)–Cd(3)–S(6)  | 94.61(2)/ <b>98.35</b>   |                  |                          |
| Cd(4)–S(5)**   | 2.478(7)/ <b>2.526</b> | S(4)–Cd(3)–S(7)  | 118.47(2)/ <b>114.94</b> |                  |                          |
| Cd(4)–S(6)*    | 2.554(6)/ <b>2.638</b> | S(4)–Cd(3)–S(8)  | 113.33(2)/ <b>114.64</b> |                  |                          |
| Cd(4)–S(10)*   | 2.559(6)/ <b>2.648</b> | S(6)–Cd(3)–S(7)  | 114.82(2)/ <b>114.85</b> |                  |                          |

\* – bridging sulfur; \*\* – donating sulfur

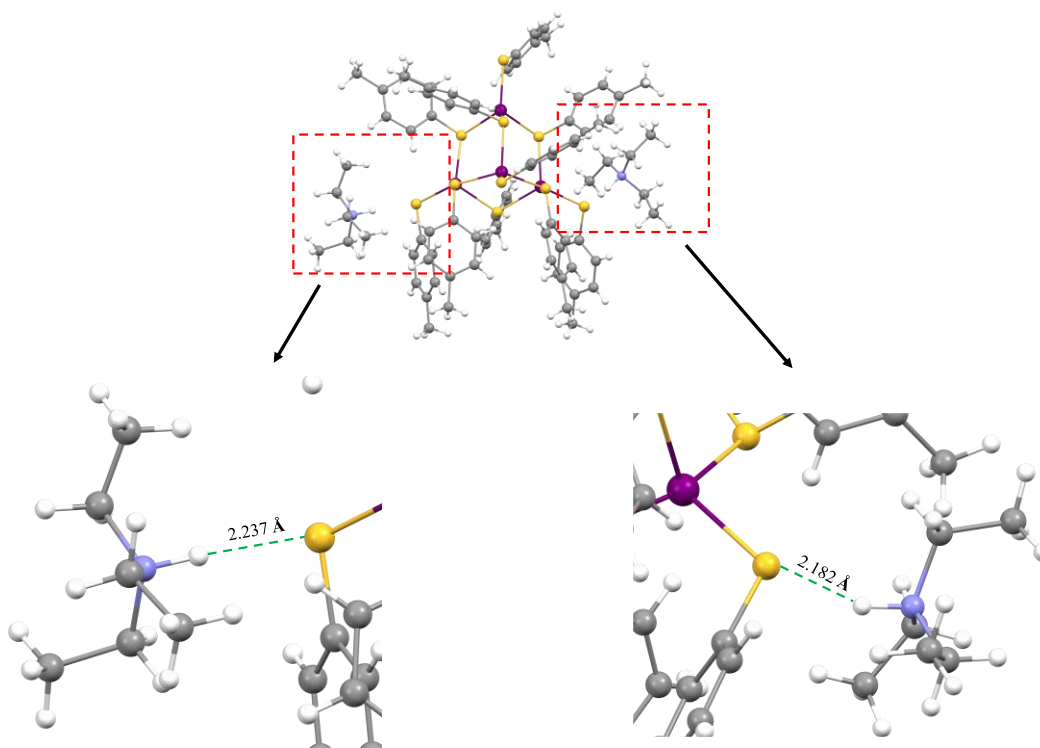

**Figure S2.** S...H–N hydrogen bonding in [(HNEt<sub>3</sub>)<sub>2</sub>][Cd<sub>4</sub>(*p*-MBT)<sub>10</sub>] cluster.

**Table S2.** N–H...S interaction comparison of the [(HNEt<sub>3</sub>)<sub>2</sub>][Cd<sub>4</sub>(*p*-MBT)<sub>10</sub>] cluster with the related compound

| Compound                                                                                                                      | N–H...S interaction                       |
|-------------------------------------------------------------------------------------------------------------------------------|-------------------------------------------|
| [(HNEt <sub>3</sub> ) <sub>2</sub> ][Cd <sub>4</sub> ( <i>p</i> -MBT) <sub>10</sub> ] (current work)                          | 2.237 Å/2.182 Å                           |
| (TACN) <sub>2</sub> Fe <sub>2</sub> S <sub>6</sub> [1]                                                                        | 2.40 Å–2.62 Å (exp.)/2.31 Å–2.32 Å (cal.) |
| [Cd(1,2-S <sub>2</sub> -3,6-( <i>t</i> -BuCONH) <sub>2</sub> C <sub>6</sub> H <sub>2</sub> ) <sub>2</sub> ] <sup>2–</sup> [2] | 2.348 Å–2.482 Å                           |
| [Hg <sup>II</sup> (S-2-CH <sub>3</sub> NHCOC <sub>6</sub> H <sub>4</sub> ) <sub>4</sub> ] <sup>2–</sup> [3]                   | 2.319 Å                                   |

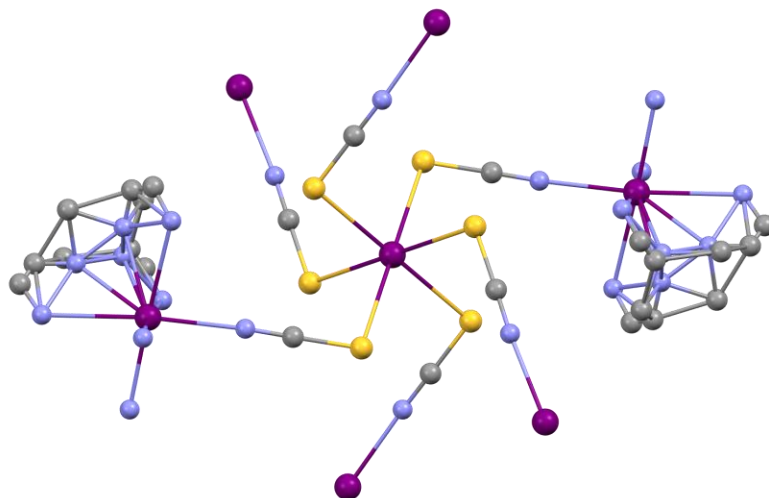

**Figure S3.** Total structure of  $[\text{Cd}_{1.5}(\text{bbta})_{1.5}(\text{NCS})_3]_n$  polymer. Such a structure shows the octahedron coordination environment for  $\text{Cd}^{2+}$ . All hydrogen atoms are omitted for clarity. [4]

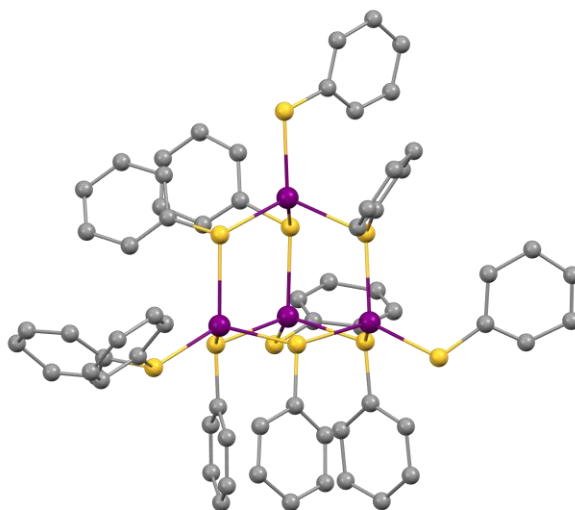

**Figure S4.** Total structure of  $\text{Cd}_4(\text{SPh})_{10}^{2-}$ . This structure shows the  $\text{Cd}_4\text{S}_{10}$  configuration obtained from the most used thiophenol ligand. All hydrogen atoms are omitted for clarity. [5]

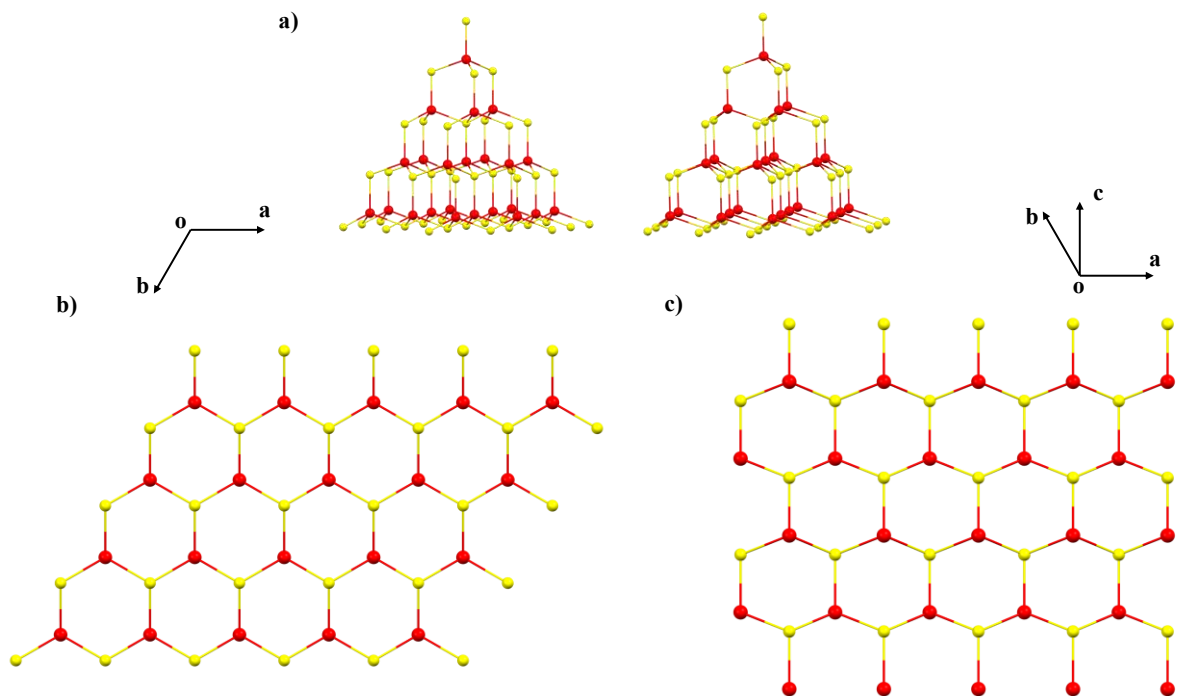

**Figure S5.** (a) Two views of bulk CdS wurtzite structure. (b) Viewed along c axis. Cd-S bond distance on this plane is equal. (c) Cd-S bond distance along the c axis on this plane is not equal to those in other directions. [6]

*Type 1*

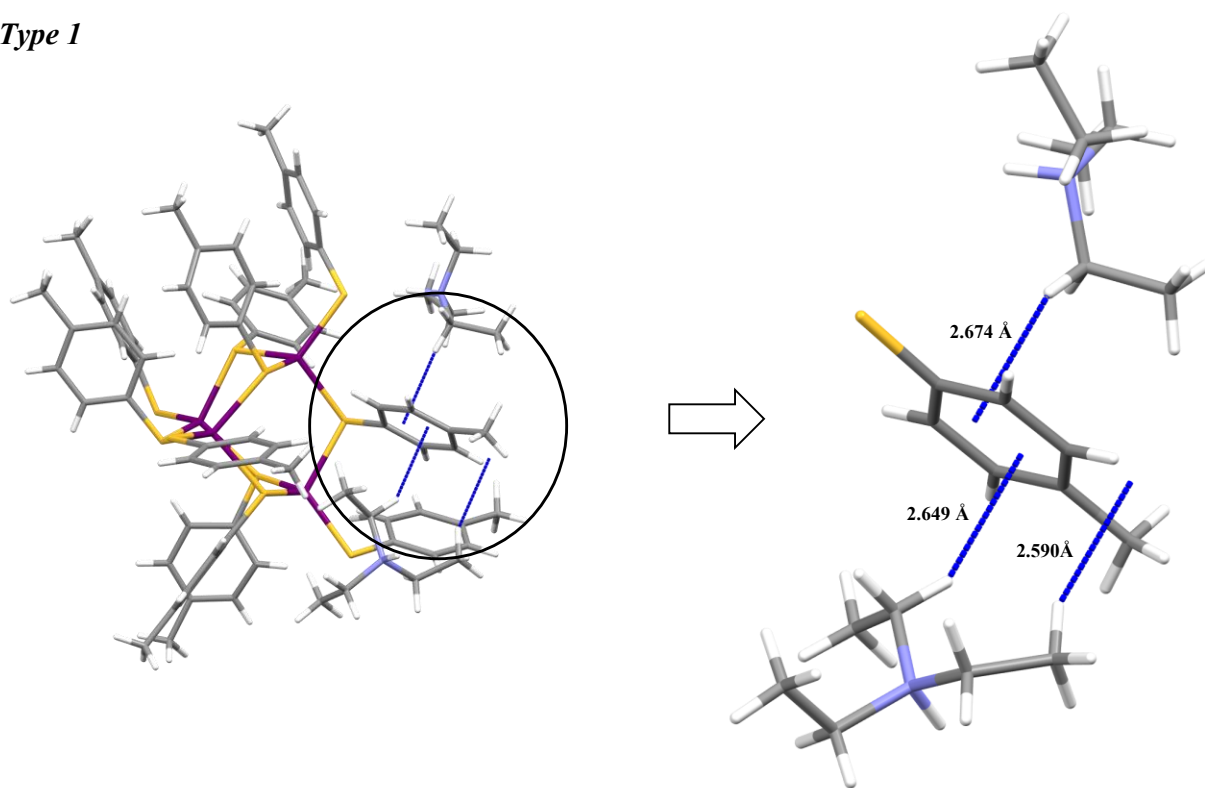

**Figure S6.** C-H... $\pi$  interaction between  $p$ -MBT<sup>-</sup> and HNEt<sub>3</sub><sup>+</sup>: 2.590-2.674 Å.



*Type 2*

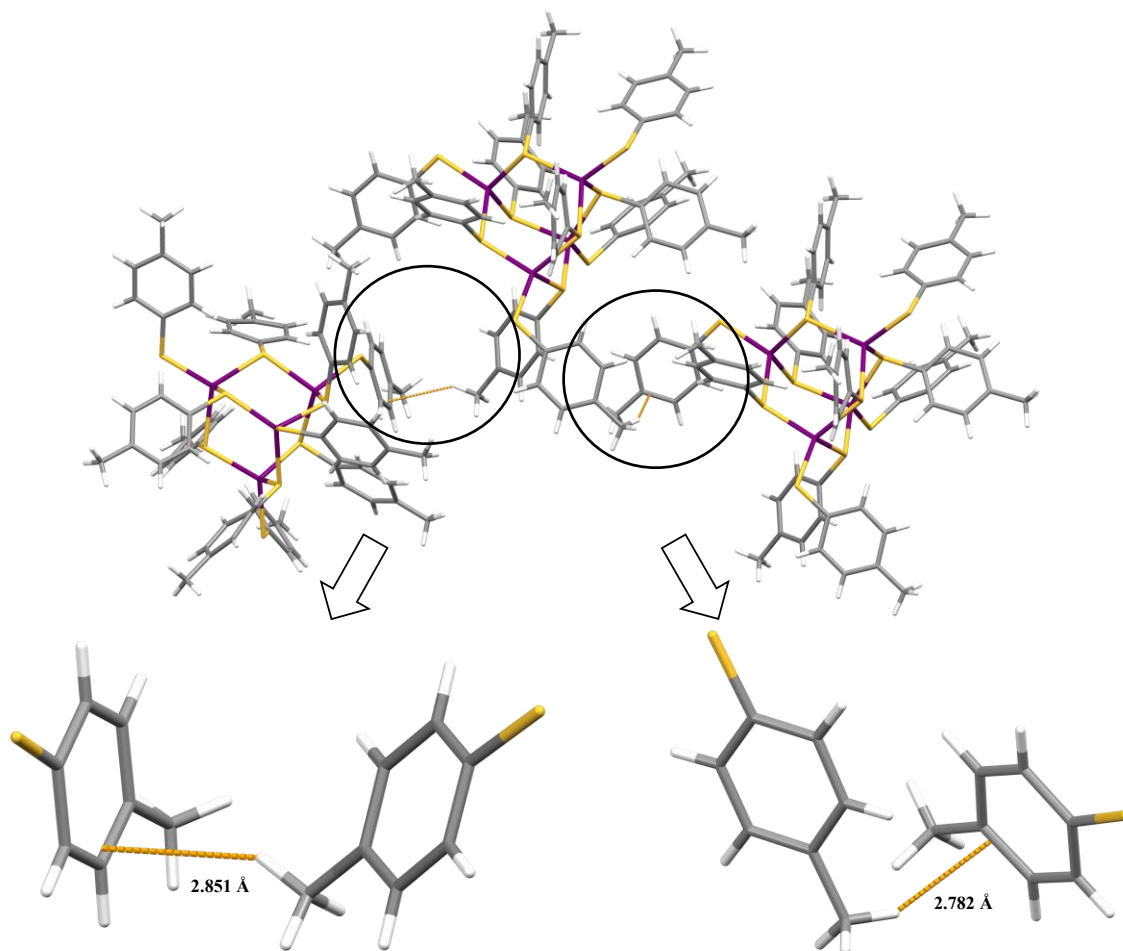

**Figure S7.** C–H... $\pi$  interaction between the neighboring *p*-MBT<sup>−</sup> ligands.

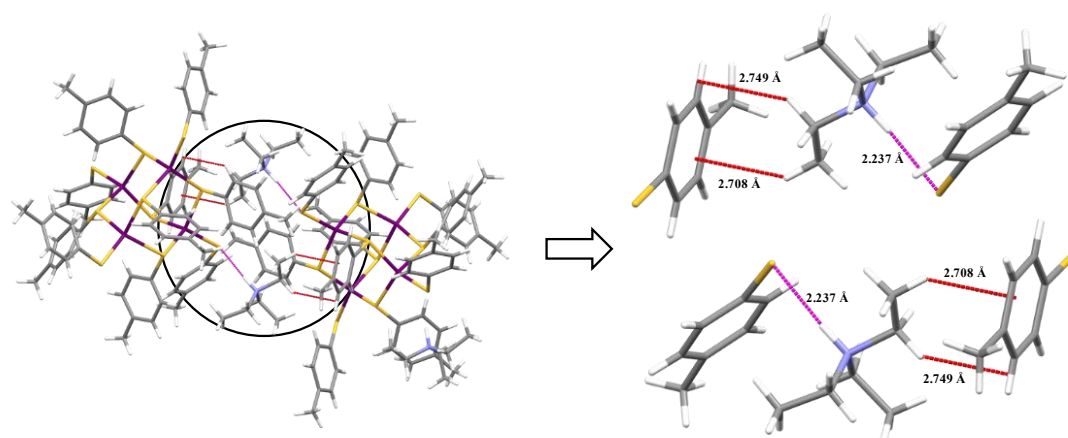

| Interaction                          | Distance      |
|--------------------------------------|---------------|
| C-H $\cdots$ $\pi$ interaction (---) | 2.708/2.749 Å |
| H bonding (---)                      | 2.237 Å       |

**Figure S8.** C-H $\cdots$  $\pi$  and hydrogen bonding interactions between *p*-MBT<sup>−</sup> ligand and HNEt<sub>3</sub><sup>+</sup>: 2.708/2.749 Å and H bonding: 2.237 Å.

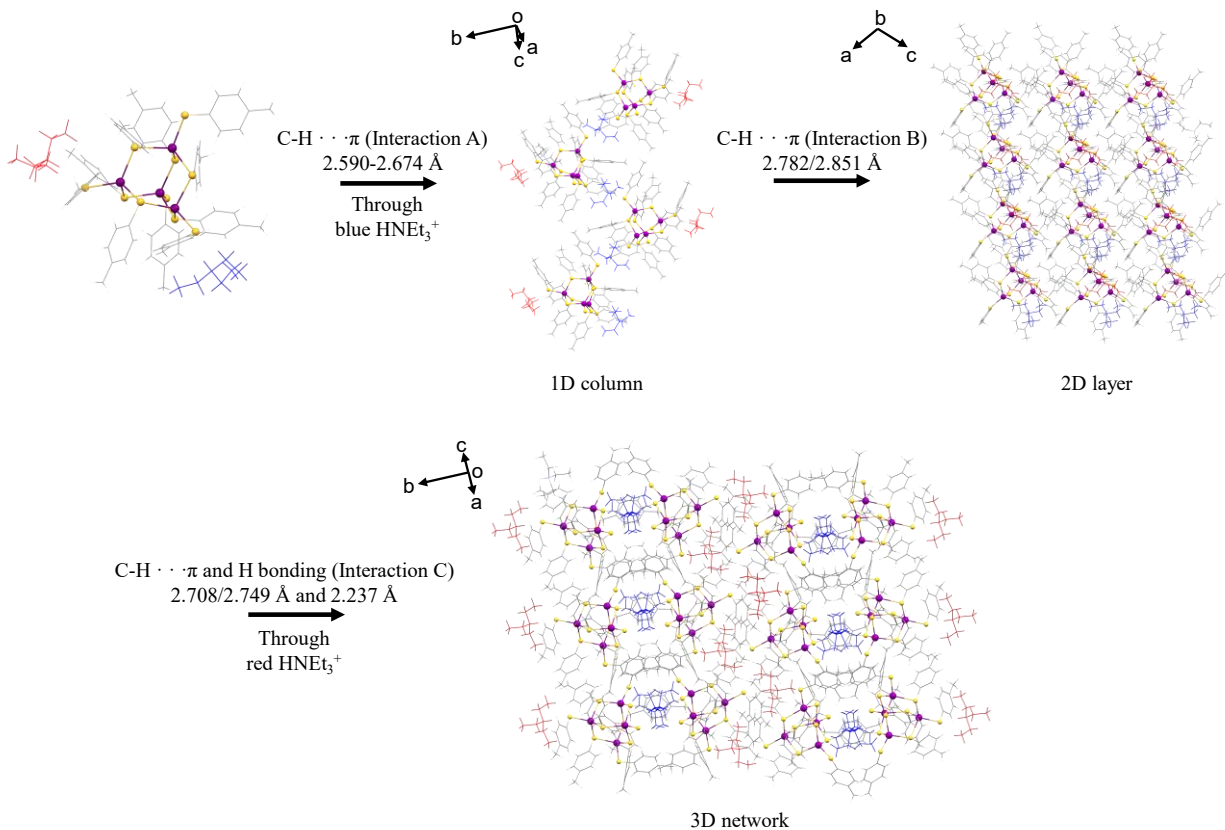

**Figure S9.** Single-crystal packing structure of  $[(\text{HNEt}_3)_2][\text{Cd}_4(p\text{-MBT})_{10}]$  through different interactions.

## Optical Properties

**Table S3.** Photoluminescence excitation and photoluminescence comparison of the  $\text{Cd}_4(p\text{-MBT})_{10}$  cluster with the related compound

| Compound                                                                       | Ex. (nm) | Em. (nm) | Stokes shift (nm) |
|--------------------------------------------------------------------------------|----------|----------|-------------------|
| $[\text{Cd}_4(p\text{-MBT})_{10}]^{2-}$                                        | 325      | 360      | 35                |
| $\text{Cd}_3(\text{OH})_2\text{Cl}_2(4\text{-PTZ})_2$ [7]                      | 340      | 390      | 50                |
| $[\text{Cd}_{10}\text{S}_4(\text{SPh})_{16}]^{4-}$ [8]                         | 350      | 430      | 80                |
| $\text{Cd}_{32}\text{S}_{14}(\text{SC}_6\text{H}_5)_{36}\cdot\text{DMF}_4$ [9] | 384      | 500      | 116               |
| CdS NPs (~14 nm) [10]                                                          | 445      | 536      | 91                |
| CdS NPs (~21 nm) [10]                                                          | 480      | 589      | 109               |

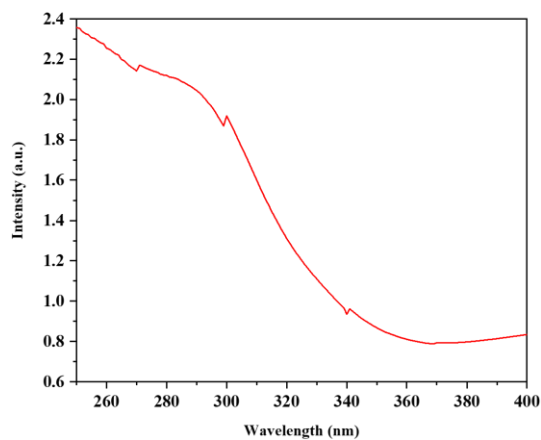

**Figure S10.** The UV-Vis spectrum of  $[(\text{HNEt}_3)_2][\text{Cd}_4(p\text{-MBT})_{10}]$ .

### Theoretical Calculation Details

Density functional theory (DFT) calculations were performed using the Gaussian 09 software package.[11] Due to the cost of calculation, only the  $\text{Cd}_4(p\text{-MBT})_{10}^{2-}$  core was evaluated. The geometry was optimized and the energy was calculated at the B3LYP/def2-TZVP level. No symmetry restrictions were used during the calculations. The calculated structures correspond to local energy minima (without imaginary frequencies). The molecular orbital (MOs) diagrams and molecular electrostatic potential (MEP) maps were generated by GaussView.

**Table S4.** Cartesian coordinates of the  $\text{Cd}_4(p\text{-MBT})_{10}^{2-}$

| Tag | Symbol | X        | Y        | Z        |
|-----|--------|----------|----------|----------|
| 1   | Cd     | 0.234814 | 2.562502 | -0.88821 |
| 2   | Cd     | -1.18716 | -0.26365 | 2.298181 |
| 3   | Cd     | -0.63121 | -1.70283 | -1.93431 |
| 4   | Cd     | 2.952279 | -0.63854 | 0.512775 |
| 5   | S      | -2.28938 | -0.52284 | 4.556482 |
| 6   | S      | 0.003225 | 4.83152  | -1.97553 |
| 7   | S      | 1.833507 | -2.31385 | -1.20959 |
| 8   | S      | 5.391082 | -1.08524 | 1.003076 |
| 9   | S      | -1.35092 | -3.37334 | -3.68813 |
| 10  | S      | 1.323609 | -1.03547 | 2.545342 |
| 11  | S      | -2.07816 | -1.65977 | 0.263087 |
| 12  | S      | -0.98634 | 2.235532 | 1.44697  |
| 13  | S      | 2.648209 | 1.900377 | -0.07584 |
| 14  | S      | -0.45193 | 0.810777 | -2.71824 |
| 15  | C      | 1.419486 | 6.902543 | 1.262223 |
| 16  | H      | 1.738387 | 6.680182 | 2.275365 |
| 17  | C      | -4.03222 | -0.76953 | 4.393278 |
| 18  | C      | -4.70177 | -1.03113 | 3.191922 |
| 19  | H      | -4.14574 | -1.09326 | 2.266002 |
| 20  | C      | 0.566832 | 6.080851 | -0.86144 |
| 21  | C      | 1.572641 | 0.999884 | 4.448321 |
| 22  | H      | 0.710353 | 1.470292 | 3.99494  |
| 23  | C      | 2.079084 | -0.18994 | 3.923489 |
| 24  | C      | -3.10264 | -3.33131 | -3.90697 |
| 25  | C      | -2.58797 | 3.021946 | 1.478795 |

|    |   |          |          |          |
|----|---|----------|----------|----------|
| 26 | C | 0.994603 | 5.855088 | 0.453873 |
| 27 | H | 0.990439 | 4.851944 | 0.858838 |
| 28 | C | 3.732014 | 2.368489 | -1.41414 |
| 29 | C | 3.215684 | -0.74532 | 4.518375 |
| 30 | H | 3.6358   | -1.65784 | 4.117014 |
| 31 | C | -1.55612 | -3.89401 | 1.866996 |
| 32 | H | -0.90239 | -3.26639 | 2.457545 |
| 33 | C | 2.883127 | -2.38913 | -2.64977 |
| 34 | C | 6.043633 | -5.37633 | 2.574073 |
| 35 | C | -2.22118 | -3.37091 | 0.757628 |
| 36 | C | 1.441229 | 8.220378 | 0.808095 |
| 37 | C | 3.816419 | -0.12955 | 5.607218 |
| 38 | H | 4.704649 | -0.57864 | 6.039191 |
| 39 | C | -4.38277 | 1.911384 | -2.90697 |
| 40 | H | -5.18204 | 2.117151 | -2.20362 |
| 41 | C | 3.902064 | 3.726863 | -1.70254 |
| 42 | H | 3.353349 | 4.46646  | -1.13527 |
| 43 | C | 3.306887 | 1.051294 | 6.147832 |
| 44 | C | 4.784296 | -4.97735 | 2.125384 |
| 45 | H | 3.95971  | -5.6827  | 2.145751 |
| 46 | C | -3.13696 | 1.541843 | -2.41499 |
| 47 | H | -2.98884 | 1.459201 | -1.34688 |
| 48 | C | 7.06397  | -4.42593 | 2.529611 |
| 49 | H | 8.057932 | -4.6934  | 2.87597  |
| 50 | C | -3.20107 | -5.55085 | 0.38164  |
| 51 | H | -3.84694 | -6.18657 | -0.21475 |
| 52 | C | -2.30655 | 1.400649 | -4.65933 |
| 53 | H | -1.49461 | 1.206421 | -5.34781 |
| 54 | C | -2.54161 | -6.08162 | 1.490696 |
| 55 | C | -6.18534 | -0.92027 | 5.521747 |
| 56 | H | -6.74997 | -0.87722 | 6.448717 |
| 57 | C | -3.72482 | -4.43748 | -4.50585 |
| 58 | H | -3.11701 | -5.2879  | -4.78956 |
| 59 | C | 6.839593 | -3.14037 | 2.056503 |
| 60 | H | 7.652285 | -2.42433 | 2.038968 |
| 61 | C | -5.09508 | -4.4627  | -4.7325  |
| 62 | H | -5.53599 | -5.33966 | -5.19711 |

|    |   |          |          |          |
|----|---|----------|----------|----------|
| 63 | C | 1.936314 | 9.345284 | 1.680731 |
| 64 | H | 1.773178 | 9.128247 | 2.738566 |
| 65 | H | 1.426873 | 10.28397 | 1.449043 |
| 66 | H | 3.010199 | 9.519037 | 1.548766 |
| 67 | C | -5.91466 | -3.39498 | -4.36873 |
| 68 | C | 5.485976 | 3.210559 | -3.46787 |
| 69 | C | -4.81371 | -0.7198  | 5.560456 |
| 70 | H | -4.32518 | -0.52315 | 6.507096 |
| 71 | C | -5.29772 | -2.29513 | -3.76971 |
| 72 | H | -5.89603 | -1.44118 | -3.4689  |
| 73 | C | 5.315605 | 1.860112 | -3.17118 |
| 74 | H | 5.861313 | 1.111308 | -3.73482 |
| 75 | C | -7.40182 | -3.4189  | -4.6147  |
| 76 | H | -7.9656  | -3.22051 | -3.69861 |
| 77 | H | -7.72167 | -4.39054 | -4.9968  |
| 78 | H | -7.70408 | -2.66183 | -5.3457  |
| 79 | C | -5.98108 | 2.393744 | -4.80663 |
| 80 | H | -5.90671 | 3.044999 | -5.68078 |
| 81 | H | -6.57415 | 2.910953 | -4.05036 |
| 82 | H | -6.54185 | 1.504298 | -5.1118  |
| 83 | C | 6.392048 | 3.658344 | -4.58621 |
| 84 | H | 5.831532 | 3.823157 | -5.51245 |
| 85 | H | 7.158936 | 2.910772 | -4.79834 |
| 86 | H | 6.89423  | 4.597325 | -4.34149 |
| 87 | C | -4.61897 | 2.026875 | -4.27607 |
| 88 | C | 6.292146 | -6.78068 | 3.062576 |
| 89 | H | 6.347734 | -7.49428 | 2.233342 |
| 90 | H | 5.492958 | -7.12289 | 3.72517  |
| 91 | H | 7.233254 | -6.84691 | 3.612878 |
| 92 | C | -6.43388 | 5.015216 | 1.708133 |
| 93 | H | -6.46479 | 5.722812 | 2.543133 |
| 94 | H | -7.24815 | 4.302172 | 1.861316 |
| 95 | H | -6.64606 | 5.575571 | 0.795661 |
| 96 | C | 3.9422   | 1.695194 | 7.353473 |
| 97 | H | 3.762283 | 2.77196  | 7.369189 |
| 98 | H | 5.022336 | 1.533781 | 7.367745 |
| 99 | H | 3.539742 | 1.284466 | 8.285781 |

|     |   |          |          |          |
|-----|---|----------|----------|----------|
| 100 | C | -3.05058 | -4.22011 | 0.019187 |
| 101 | H | -3.57489 | -3.8363  | -0.8457  |
| 102 | C | 0.586038 | 7.410603 | -1.31596 |
| 103 | H | 0.256554 | 7.620568 | -2.32631 |
| 104 | C | 4.451802 | 1.440327 | -2.16669 |
| 105 | H | 4.346139 | 0.381424 | -1.97616 |
| 106 | C | -2.07773 | 1.281358 | -3.28582 |
| 107 | C | 5.573891 | -2.73809 | 1.599826 |
| 108 | C | -6.07759 | -1.22672 | 3.164    |
| 109 | H | -6.55366 | -1.43018 | 2.210396 |
| 110 | C | 2.177515 | 1.602045 | 5.544741 |
| 111 | H | 1.760087 | 2.526604 | 5.929051 |
| 112 | C | -3.92889 | -2.25692 | -3.5456  |
| 113 | H | -3.49833 | -1.37625 | -3.089   |
| 114 | C | -6.85205 | -1.17553 | 4.321459 |
| 115 | C | 4.548937 | -3.6944  | 1.649349 |
| 116 | H | 3.554624 | -3.43751 | 1.309868 |
| 117 | C | -1.72273 | -5.22642 | 2.225121 |
| 118 | H | -1.19748 | -5.60258 | 3.096392 |
| 119 | C | 1.010401 | 8.44877  | -0.50009 |
| 120 | H | 1.004209 | 9.461948 | -0.8915  |
| 121 | C | 4.761436 | 4.133643 | -2.71265 |
| 122 | H | 4.865921 | 5.194337 | -2.91581 |
| 123 | C | -5.09955 | 4.318774 | 1.621757 |
| 124 | C | -2.68631 | -7.5357  | 1.860095 |
| 125 | H | -1.99684 | -8.16327 | 1.285746 |
| 126 | H | -3.69711 | -7.89861 | 1.659902 |
| 127 | H | -2.47191 | -7.6995  | 2.917918 |
| 128 | C | -8.3472  | -1.36318 | 4.27944  |
| 129 | H | -8.70069 | -1.96043 | 5.124344 |
| 130 | H | -8.6556  | -1.86791 | 3.361865 |
| 131 | H | -8.87865 | -0.4057  | 4.317805 |
| 132 | C | -3.556   | 1.765496 | -5.14089 |
| 133 | H | -3.705   | 1.848601 | -6.21255 |
| 134 | C | 2.373182 | -2.29995 | -3.94761 |
| 135 | H | 1.315403 | -2.14273 | -4.11049 |
| 136 | C | 4.257297 | -2.60542 | -2.49734 |



|     |   |          |          |          |
|-----|---|----------|----------|----------|
| 137 | H | 4.685571 | -2.67442 | -1.50627 |
| 138 | C | -4.17802 | 4.633114 | 0.625538 |
| 139 | H | -4.42401 | 5.386199 | -0.11564 |
| 140 | C | 5.084313 | -2.7194  | -3.60711 |
| 141 | H | 6.14561  | -2.8835  | -3.45169 |
| 142 | C | -4.73572 | 3.341286 | 2.549756 |
| 143 | H | -5.42777 | 3.061239 | 3.336836 |
| 144 | C | 5.488457 | -2.72122 | -6.10549 |
| 145 | H | 5.844885 | -1.73271 | -6.4142  |
| 146 | H | 4.971689 | -3.15994 | -6.96194 |
| 147 | H | 6.368949 | -3.33163 | -5.89366 |
| 148 | C | -3.50451 | 2.705127 | 2.488223 |
| 149 | H | -3.25322 | 1.95657  | 3.228636 |
| 150 | C | 3.210613 | -2.42281 | -5.0488  |
| 151 | H | 2.778826 | -2.35261 | -6.04161 |
| 152 | C | 4.581497 | -2.63028 | -4.90505 |
| 153 | C | -2.94179 | 4.00078  | 0.547906 |
| 154 | H | -2.25565 | 4.277483 | -0.24264 |

## References

1. Francois, S.; Rohmer, M. M.; Be´nard, M.; Moreland, A. C.; Rauchfuss, T. B. The N-H...S Hydrogen Bond in (TACN)<sub>2</sub>Fe<sub>2</sub>S<sub>6</sub> (TACN = Triazacyclononane) and in Model Systems Involving the Persulfido Moiety: An ab Initio and DFT Study. *J. Am. Chem. Soc.* **2000**, *122*, 12743-12750.
2. Baba, T.; Okamura, T.; Yamamoto, H.; Yamamoto, T.; Ueyama, N. Zinc, Cadmium, and Mercury 1,2-Benzenedithiolates with Intramolecular NH...S Hydrogen Bonds. *Inorg. Chem.* **2008**, *47*, 2837-2848.
3. Kato, M.; Kojima, K.; Okamura, T.; Yamamoto, H.; Yamamura, T.; Ueyama, N. Relation between Intramolecular NH...S Hydrogen Bonds and Coordination Number in Mercury(II) Complexes with Carbamoylbenzenethiol Derivatives. *Inorg. Chem.* **2005**, *44*, 4037-4044.
4. Zhou, J.; Peng, Y.; Zhang, Y.; Li, B.; Zhang, Y. Synthesis, Crystal Structure and Luminescent Properties of a Novel Cadmium Coordination Polymer with Unprecedented One-Dimensional Hetero-Triple-Stranded Chain. *Inorg. Chem. Commun.* **2004**, *7*, 1181-1183.
5. Zhang, X.; Tian, Y.; Jin, F.; Wu, J.; Xie, Y.; Tao, X.; Jiang, M. Self-Assembly of an Organic Chromophore with Cd-S Nanoclusters: Supramolecular Structures and Enhanced Emissions. *Cryst. Growth Des.* **2005**, *5*, 565-570.
6. Xu, Y. N.; Ching, W. Y. Electronic, Optical, and Structural Properties of Some Wurtzite Crystals. *Phys. Rev. B* **1993**, *48*, 4335-4351.
7. Xue, X.; Wang, X. S.; Wang, L. Z.; Xiong, R. G.; Abrahams, B. F.; You, X. Z.; Xue, Z. L.; Che, C. M. Hydrothermal Preparation of Novel Cd(II) Coordination Polymers Employing 5-(4-Pyridyl)tetrazolate as a Bridging Ligand. *Inorg. Chem.* **2002**, *41*, 6544-6546.
8. Adams, R. D.; Zhang, B.; Murphy, C. J.; Yeung, L. K. Halide Enhancement of the Luminescence of Cd<sub>10</sub>S<sub>4</sub> Thiolate Clusters. *Chem. Commun.* **1999**, 383-384.
9. Herron, N.; Calabrese, J. C.; Farneth, W. E.; Wang, Y. Crystal Structure and Optical Properties of Cd<sub>32</sub>S<sub>14</sub>(SC<sub>6</sub>H<sub>5</sub>)<sub>36</sub>·DMF<sub>4</sub>, a Cluster with a 15 Angstrom CdS Core. *Science* **1993**, *259*, 1426-1428.
10. Thomas, B.; Jose, E. T.; Chacko, J. K.; Divya, K. V. Green Light Emitting Cadmium Sulfide Nanoparticles with Coral Surface Morphology. *J. Clust. Sci.* **2021**, 1-13. <https://doi.org/10.1007/s10876-021-02171-9>.
11. Frisch, M.J.; Trucks, G.W.; Schlegel, H.B.; Scuseria, G.E.; Robb, M.A.; Cheeseman, J.R.; Scalmani, G.; Barone, V.; Mennucci, B.; Petersson, G.A.; et al. Gaussian 09, Revision D.01; Gaussian, Inc.: Wallingford, CT, USA, **2013**. Available online: <https://gaussian.com/glossary/g09/> (accessed on 1 September 2022).
